# Supplementary material for: Unprecedented long-range 1,7-bromination in gold complexes of N-(aryl)imino functionalized N-heterocyclic carbenes
Source: Royal Society of Chemistry journal article supplement (doi:10.1039/b807830k), 2008-01-01
Supplement: b807830k.pdf [file b807830k.pdf]

## Supporting Information

### Unprecedented Long Range 1,7-Bromination in Gold Complexes of *N*- (Aryl)imino Functionalized N-heterocyclic Carbenes

Manoja K. Samantaray,<sup>a</sup> Keliang Pang,<sup>b</sup> Mobin M. Shaikh<sup>c</sup> and Prasenjit Ghosh<sup>\*a</sup>

<sup>a</sup>Department of Chemistry and

<sup>c</sup>National Single Crystal X-ray Diffraction Facility,

Indian Institute of Technology Bombay,

Powai, Mumbai 400 076.

<sup>b</sup>Department of Chemistry,

Columbia University,

3000 Broadway,

New York, NY 10027, USA.

\* Corresponding author. Fax: +91-22-2572-3480

Email address: [pghosh@chem.iitb.ac.in](mailto:pghosh@chem.iitb.ac.in)

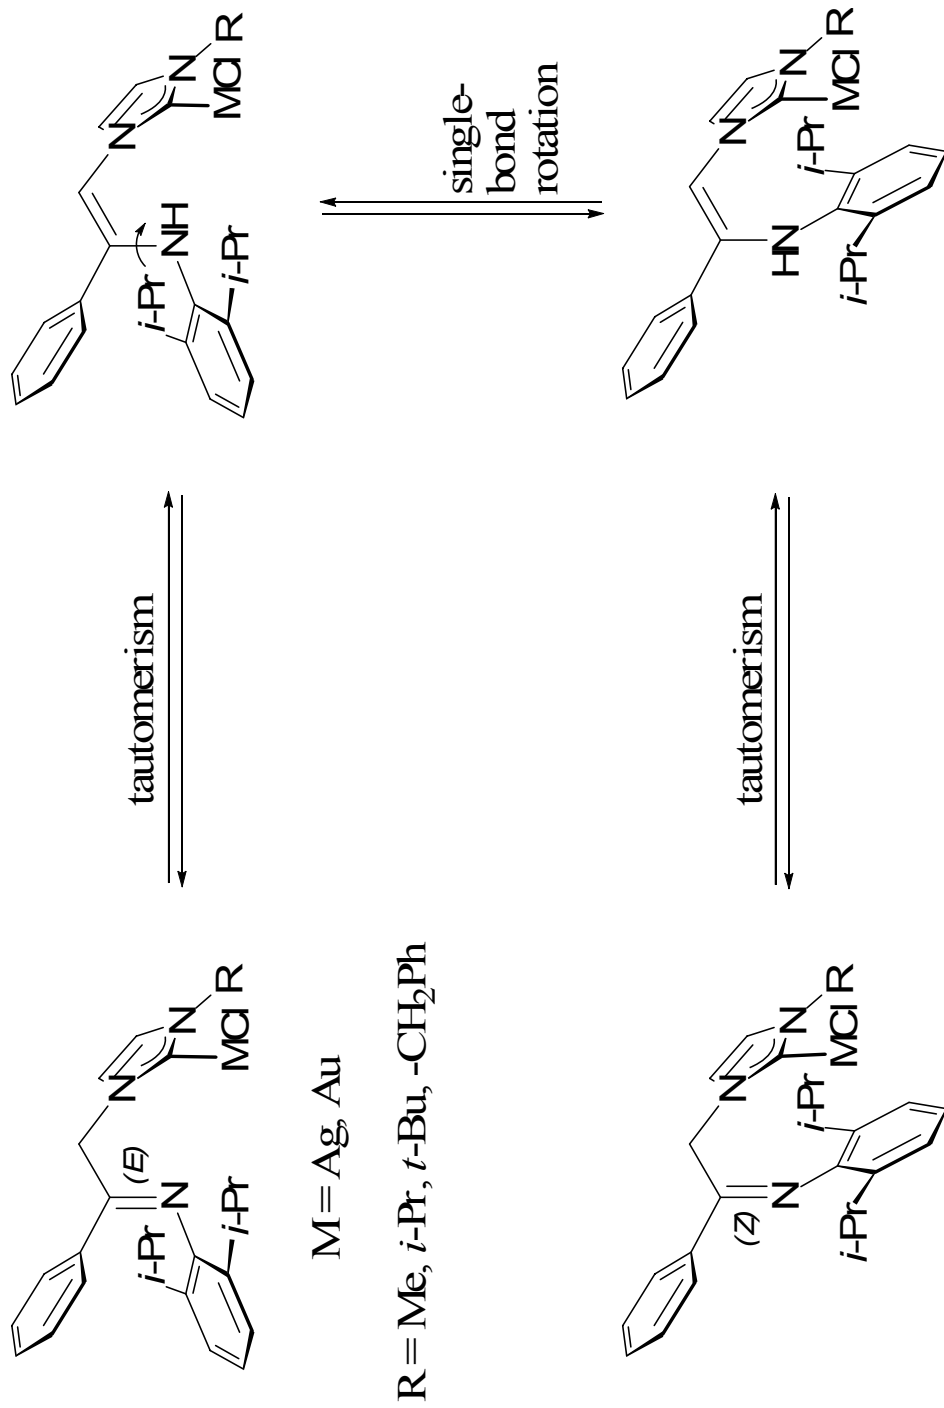

**Scheme S1.**

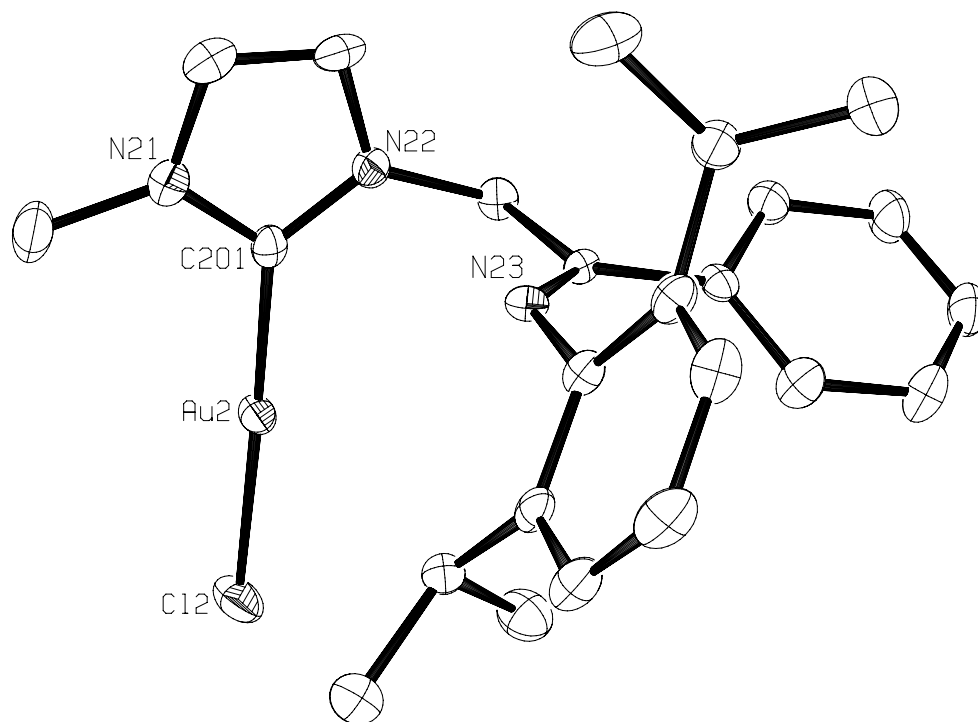

**Figure S1.** ORTEP of **1c** with thermal ellipsoids drawn at 50 % probability level. Selected bond lengths (Å) and angles (°): N21-C201 1.357(8), N22-C201 1.346(8), Au2-C201 1.978(7), Au2-Cl2 2.286(2), C201-Au2-Cl2 178.3(2).

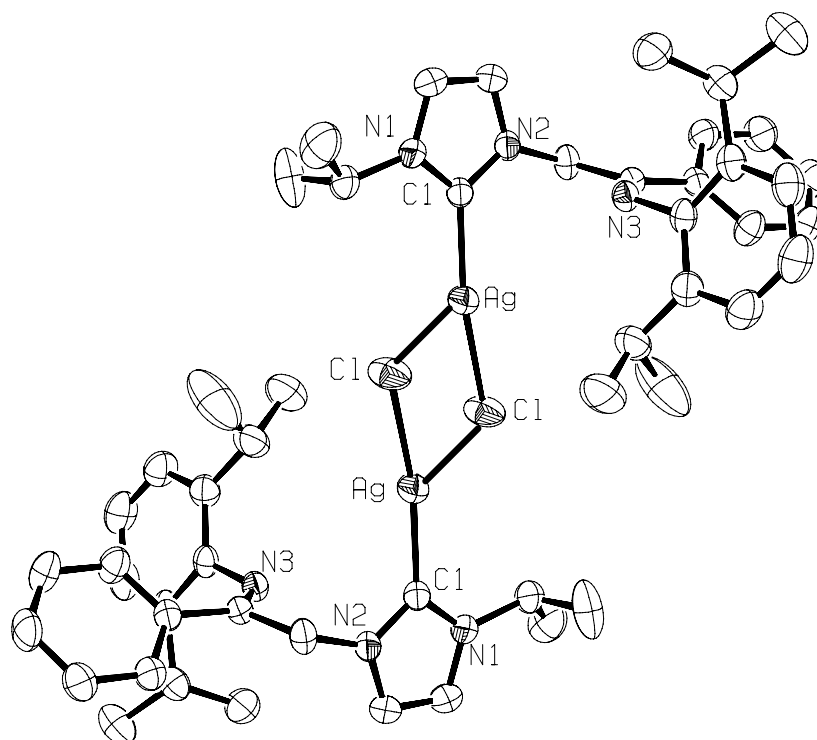

**Figure S2.** ORTEP of **2b** with thermal ellipsoids drawn at 50 % probability level. Selected bond lengths (Å) and angles (°): Ag-C1 2.086(2), N1-C1 1.351(2), N2-C1 1.356(2), C1-Ag-C11 165.02(5), N1-C1-N2 103.9(1), N2-C1-Ag 127.3 (1), N1-C1-Ag 128.6(1).

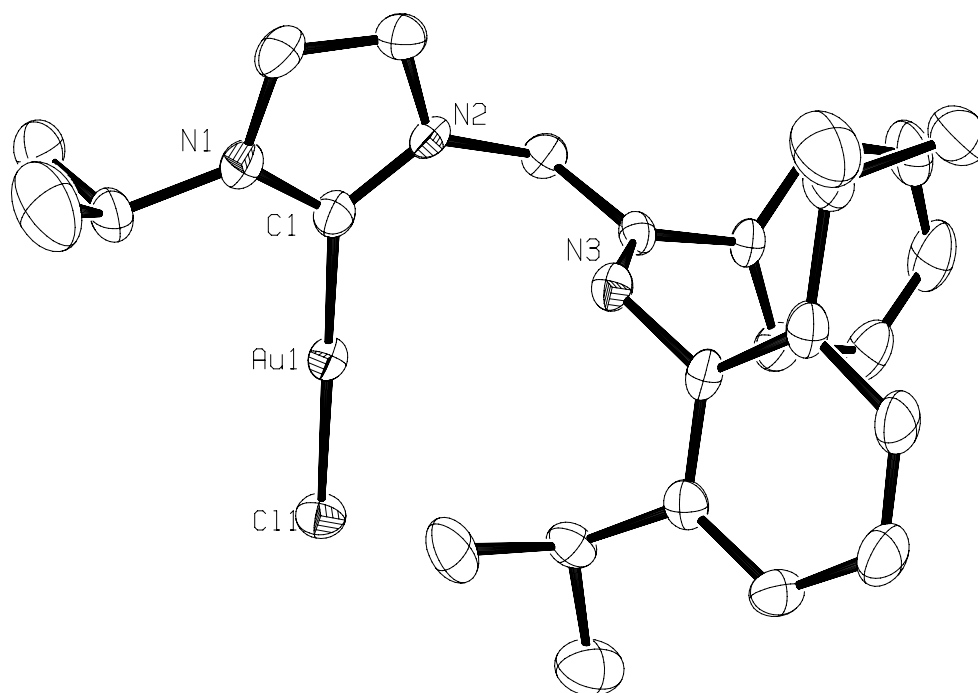

**Figure S3.** ORTEP of **2c** with thermal ellipsoids drawn at 50 % probability level. Selected bond lengths (Å) and angles (°): Au1-C1 1.972(4), N1-C1 1.352(2), N2-C1 1.345(5), C1-Au1-C11 179.4(1), N1-C1-N2 104.9(4), N2-C1-Au1 127.7 (3), N1-C1-Au1 127.4(3).

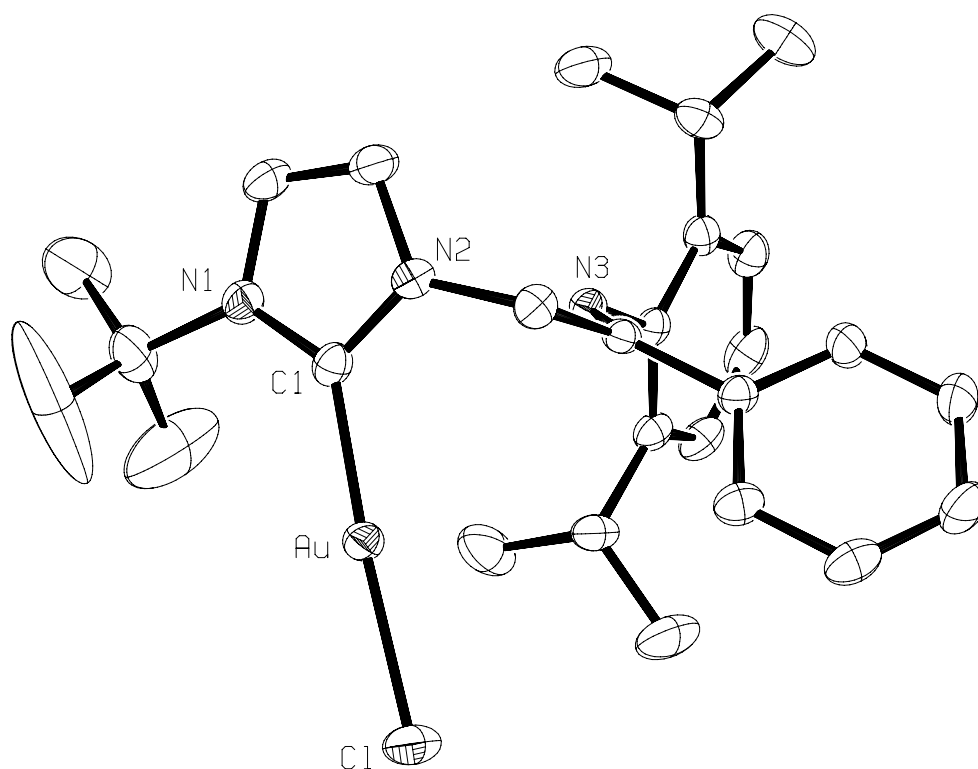

**Figure S4.** ORTEP of **3c** with thermal ellipsoids drawn at 50 % probability level. Selected bond lengths (Å) and angles (°): N1-C1 1.354(3), N2-C1 1.353(3), Au-C1 1.988(2), Au-Cl 2.2820(6), C1-Au-Cl 176.48(6).

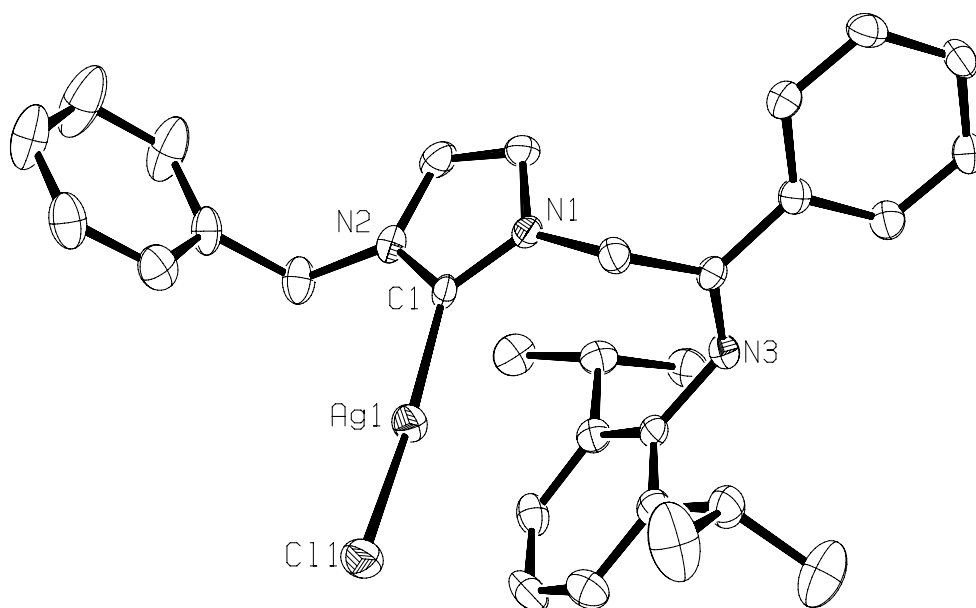

**Figure S5.** ORTEP of **4b** with thermal ellipsoids drawn at 50 % probability level. Selected bond lengths (Å) and angles (°): N1-C1 1.357(3), N2-C1 1.349(3), Ag1-C1 2.083(3), Ag1-Cl1 2.3364(7), C1-Ag1-Cl1 168.81(7).

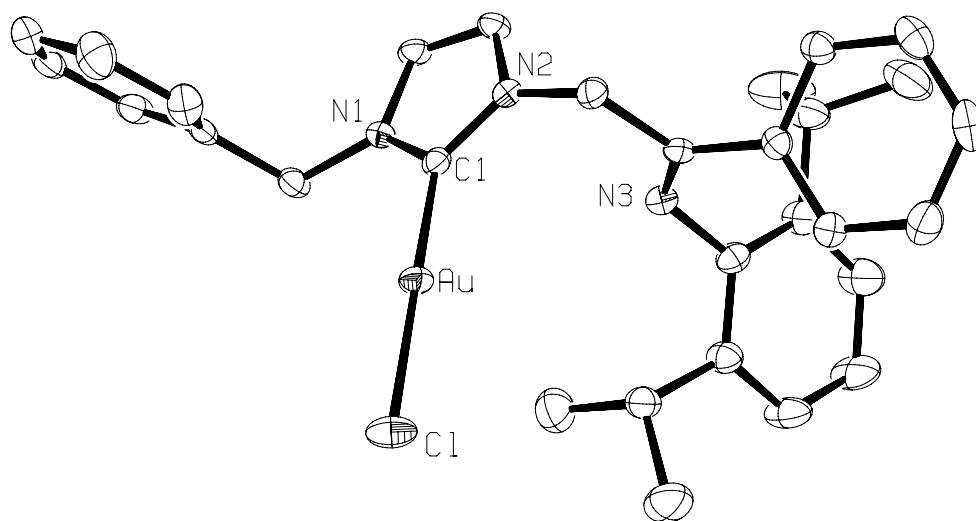

**Figure S6.** ORTEP of **4c** with thermal ellipsoids drawn at 50 % probability level. Selected bond lengths (Å) and angles (°): N1-C1 1.353(3), N2-C1 1.342(3), Au-C1 1.985(3), Au-Cl 2.2957(7), C1-Au-Cl 176.53(8).
